# Supplementary material for: An Update of Bovine Hemoplasmas Based on Phylogenetic and Genomics Analysis
Source: MDPI journal article supplement (doi:10.3390/microorganisms10101916), 2022-09-27
Supplement: s1 [file s1]

---

## SUPPLEMENTARY MATERIAL

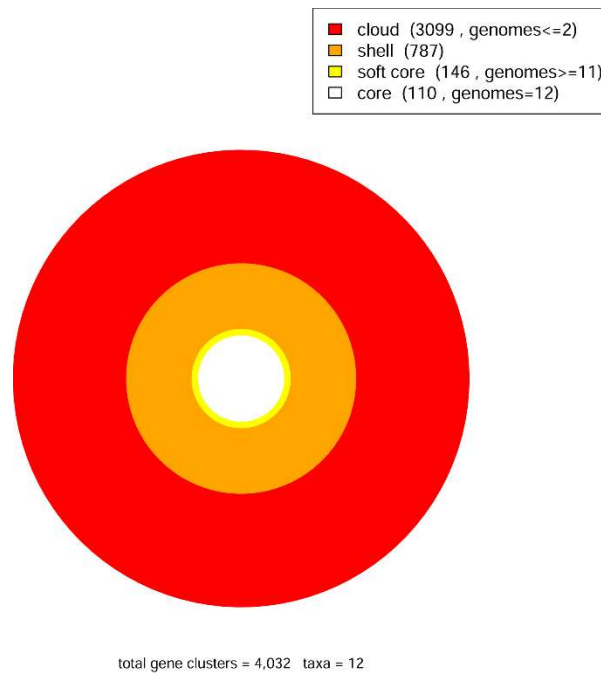

**Figure S1.** Core, soft core, shell and cloud genomes of hemoplasmas.

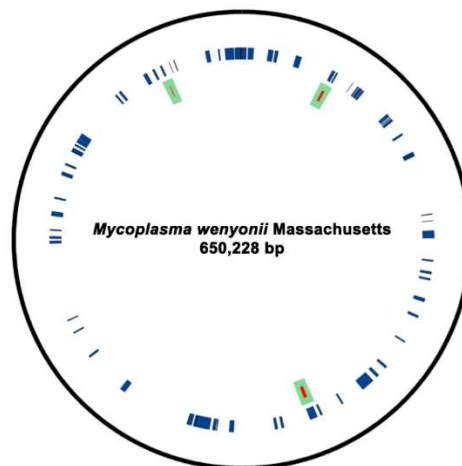

**Figure S2.** Circular map that compares three bovine hemoplasmas.

---

**Table S1.** 12 hemoplasma genomes reported in the GenBank database.

| Organism                                                  | Host                  | GenBank         |
|-----------------------------------------------------------|-----------------------|-----------------|
| ' <i>Candidatus</i> Mycoplasma haemobos' INIFAP01         | Cattle                | LWUJ000000000.1 |
| ' <i>Candidatus</i> Mycoplasma haemolamae' Purdue         | Camelids              | CP003731.1      |
| ' <i>Candidatus</i> Mycoplasma haemominutum' Birmingham 1 | Felines               | NC_021007.1     |
| <i>Mycoplasma haemocanis</i> Illinois                     | Dogs                  | CP003199.1      |
| <i>Mycoplasma haemofelis</i> Langford 1                   | Cats                  | FR773153.2      |
| <i>Mycoplasma haemofelis</i> Ohio2                        | Cats                  | CP002808.1      |
| <i>Mycoplasma ovis</i> Michigan                           | Sheep, goats and deer | CP006935.1      |
| <i>Mycoplasma parvum</i> Indiana                          | Pigs                  | CP006771.1      |
| <i>Mycoplasma suis</i> Illinois                           | Pigs                  | CP002525.1      |
| <i>Mycoplasma suis</i> KI3806                             | Pigs                  | FQ790233.1      |
| <i>Mycoplasma wenyonii</i> INIFAP02                       | Cattle                | QKVO000000000.1 |
| <i>Mycoplasma wenyonii</i> Massachusetts                  | Cattle                | CP003703.1      |

**Table S2. BLAST-based Average Nucleotide Identity (ANiB) values of alignment coverage based on the entire genome sequence of 12 hemoplasmas. Coverage values are used to assure minimal coverage requirements for competent matches.**

|                                             | ' <i>Ca. M.</i><br><i>Haemob</i><br><i>os'</i><br>INIFAP0<br>1 | <i>Ca. M.</i><br><i>Haemola</i><br><i>mae'</i><br>Purdue | <i>Ca. M.</i><br><i>Haemominut</i><br><i>um'</i><br>Birmingham<br>1 | <i>M.</i><br><i>haemoca</i><br><i>nis</i><br>Illinois | <i>M.</i><br><i>haemofe</i><br><i>lis</i><br>Langfor<br>d 1 | <i>M.</i><br><i>haemofe</i><br><i>lis</i><br>Ohio2 | <i>M. ovis</i><br><i>Michig</i><br><i>an</i> | <i>M.</i><br><i>parvu</i><br><i>m</i><br>India<br>na | <i>M.</i><br><i>suis</i><br>Illino<br>is | <i>M.</i><br><i>suis</i><br>KI380<br>6 | <i>M.</i><br><i>wenyonii</i><br>INIF<br>AP02 | <i>M.</i><br><i>wenyonii</i><br>Massach<br>usetts |
|---------------------------------------------|----------------------------------------------------------------|----------------------------------------------------------|---------------------------------------------------------------------|-------------------------------------------------------|-------------------------------------------------------------|----------------------------------------------------|----------------------------------------------|------------------------------------------------------|------------------------------------------|----------------------------------------|----------------------------------------------|---------------------------------------------------|
| <i>Ca. M. Haemobos'</i> INIFAP01            | 1                                                              | 0.0011                                                   | 0.0011                                                              | 0.0204                                                | 0.0189                                                      | 0.0203                                             | 0.0011                                       | 0.0011                                               | 0.0029                                   | 0.0028                                 | 0.0029                                       | 0.0021                                            |
| <i>Ca. M. Haemolamae'</i> Purdue            | 0.0013                                                         | 1                                                        | 0.1500                                                              | 0.0221                                                | 0.0221                                                      | 0.0248                                             | 0.1496                                       | 0.1363                                               | 0.1480                                   | 0.1595                                 | 0.1537                                       | 0.1534                                            |
| <i>Ca. M. Haemominutum'</i><br>Birmingham 1 | 0.0019                                                         | 0.2209                                                   | 1                                                                   | 0.0303                                                | 0.0345                                                      | 0.0262                                             | 0.2335                                       | 0.2690                                               | 0.2298                                   | 0.2281                                 | 0.2221                                       | 0.2169                                            |
| <i>M. haemocanis</i> Illinois               | 0.0208                                                         | 0.0182                                                   | 0.0169                                                              | 1                                                     | 0.7882                                                      | 0.7761                                             | 0.0258                                       | 0.0282                                               | 0.0233                                   | 0.0227                                 | 0.0267                                       | 0.0264                                            |
| <i>M. haemofelis</i> Langford 1             | 0.0154                                                         | 0.0146                                                   | 0.0155                                                              | 0.6320                                                | 1                                                           | 0.9765                                             | 0.0159                                       | 0.0144                                               | 0.0172                                   | 0.0164                                 | 0.0155                                       | 0.0191                                            |
| <i>M. haemofelis</i> Ohio2                  | 0.0164                                                         | 0.0162                                                   | 0.0116                                                              | 0.6177                                                | 0.9692                                                      | 1                                                  | 0.0155                                       | 0.0164                                               | 0.0178                                   | 0.0177                                 | 0.0152                                       | 0.0187                                            |
| <i>M. ovis</i> Michigan                     | 0.0014                                                         | 0.1611                                                   | 0.1708                                                              | 0.0338                                                | 0.0259                                                      | 0.0255                                             | 1                                            | 0.2285                                               | 0.2081                                   | 0.2055                                 | 0.4429                                       | 0.4337                                            |
| <i>M. parvum</i> Indiana                    | 0.0018                                                         | 0.1827                                                   | 0.2449                                                              | 0.0459                                                | 0.0292                                                      | 0.0336                                             | 0.2844                                       | 1                                                    | 0.5520                                   | 0.5496                                 | 0.0768                                       | 0.2347                                            |
| <i>M. suis</i> Illinois                     | 0.0036                                                         | 0.1508                                                   | 0.1590                                                              | 0.0288                                                | 0.0266                                                      | 0.0277                                             | 0.1969                                       | 0.4196                                               | 1                                        | 0.9088                                 | 0.0594                                       | 0.1752                                            |
| <i>M. suis</i> KI3806                       | 0.0037                                                         | 0.1702                                                   | 0.1653                                                              | 0.0294                                                | 0.0265                                                      | 0.0288                                             | 0.2036                                       | 0.4374                                               | 0.9513                                   | 1                                      | 0.1988                                       | 0.1864                                            |
| <i>M. wenyonii</i> INIFAP02                 | 0.0046                                                         | 0.1950                                                   | 0.1913                                                              | 0.0411                                                | 0.0299                                                      | 0.0295                                             | 0.5215                                       | 0.0727                                               | 0.0739                                   | 0.2363                                 | 1                                            | 0.5158                                            |
| <i>M. wenyonii</i> Massachusetts            | 0.0031                                                         | 0.1786                                                   | 0.1714                                                              | 0.0373                                                | 0.0337                                                      | 0.0332                                             | 0.4686                                       | 0.2037                                               | 0.2001                                   | 0.2033                                 | 0.4733                                       | 1                                                 |

**Table S3.** BLAST-based average nucleotide identity (ANIb) values of identity based on the entire genome sequence of 12 hemoplasmas. The values of identity of these alignments is declared as the overall genome-to-type-assembly ANI.

|                                          | <i>'Ca. M. Haemobos'</i><br>INIFAP01 | <i>Ca. M. Haemolamae'</i><br>Purdue | <i>Ca. M. Haemominutum'</i><br>Birmingham 1 | <i>M. haemocanis</i><br>Illinois | <i>M. haemofelis</i><br>Langford 1 | <i>M. haemofelis</i><br>Ohio2 | <i>M. ovis</i><br>Michigan | <i>M. parvum</i><br>Indiana | <i>M. suis</i><br>Illinois | <i>M. suis</i><br>KI3806 | <i>M. wenyonii</i><br>INIFAP02 | <i>M. wenyonii</i><br>Massachusetts |
|------------------------------------------|--------------------------------------|-------------------------------------|---------------------------------------------|----------------------------------|------------------------------------|-------------------------------|----------------------------|-----------------------------|----------------------------|--------------------------|--------------------------------|-------------------------------------|
| <i>Ca. M. Haemobos'</i> INIFAP01         | 1                                    | 0.7134                              | 0.7241                                      | 0.7368                           | 0.7377                             | 0.7344                        | 0.7250                     | 0.7336                      | 0.7139                     | 0.7140                   | 0.7412                         | 0.7416                              |
| <i>Ca. M. Haemolamae'</i> Purdue         | 0.7134                               | 1                                   | 0.7258                                      | 0.7270                           | 0.7325                             | 0.7413                        | 0.7369                     | 0.7215                      | 0.7324                     | 0.7353                   | 0.7354                         | 0.7413                              |
| <i>Ca. M. Haemominutum'</i> Birmingham 1 | 0.7241                               | 0.7258                              | 1                                           | 0.7447                           | 0.7277                             | 0.7527                        | 0.7316                     | 0.7376                      | 0.7359                     | 0.7396                   | 0.7334                         | 0.7345                              |
| <i>M. haemocanis</i> Illinois            | 0.7368                               | 0.7270                              | 0.7447                                      | 1                                | 0.8247                             | 0.8274                        | 0.7319                     | 0.7343                      | 0.7346                     | 0.7345                   | 0.7291                         | 0.7269                              |
| <i>M. haemofelis</i> Langford 1          | 0.7377                               | 0.7325                              | 0.7277                                      | 0.8247                           | 1                                  | 0.9741                        | 0.7248                     | 0.7350                      | 0.7357                     | 0.7352                   | 0.7316                         | 0.7297                              |
| <i>M. haemofelis</i> Ohio2               | 0.7344                               | 0.7413                              | 0.7527                                      | 0.8274                           | 0.9741                             | 1                             | 0.7493                     | 0.7342                      | 0.7368                     | 0.7358                   | 0.7356                         | 0.7310                              |
| <i>M. ovis</i> Michigan                  | 0.7250                               | 0.7369                              | 0.7316                                      | 0.7319                           | 0.7248                             | 0.7493                        | 1                          | 0.7452                      | 0.7445                     | 0.7431                   | 0.7826                         | 0.7847                              |
| <i>M. parvum</i> Indiana                 | 0.7336                               | 0.7215                              | 0.7376                                      | 0.7343                           | 0.7350                             | 0.7342                        | 0.7452                     | 1                           | 0.7784                     | 0.7785                   | 0.7430                         | 0.7414                              |
| <i>M. suis</i> Illinois                  | 0.7139                               | 0.7324                              | 0.7359                                      | 0.7346                           | 0.7357                             | 0.7368                        | 0.7445                     | 0.7784                      | 1                          | 0.9763                   | 0.7397                         | 0.7500                              |
| <i>M. suis</i> KI3806                    | 0.7140                               | 0.7353                              | 0.7396                                      | 0.7345                           | 0.7352                             | 0.7358                        | 0.7431                     | 0.7785                      | 0.9763                     | 1                        | 0.7403                         | 0.7501                              |
| <i>M. wenyonii</i> INIFAP02              | 0.7412                               | 0.7354                              | 0.7334                                      | 0.7291                           | 0.7316                             | 0.7356                        | 0.7826                     | 0.7430                      | 0.7397                     | 0.7403                   | 1                              | 0.7937                              |
| <i>M. wenyonii</i> Massachusetts         | 0.7416                               | 0.7413                              | 0.7345                                      | 0.7269                           | 0.7297                             | 0.7310                        | 0.7847                     | 0.7414                      | 0.7500                     | 0.7501                   | 0.7937                         | 1                                   |
